# Supplementary material
Source: Springer Nature journal article supplement (https://www.springermedizin.de/resource/supplementary/13256_2008_1123_MOESM2_ESM.pdf/9647054)

### Changes in T-ALP level

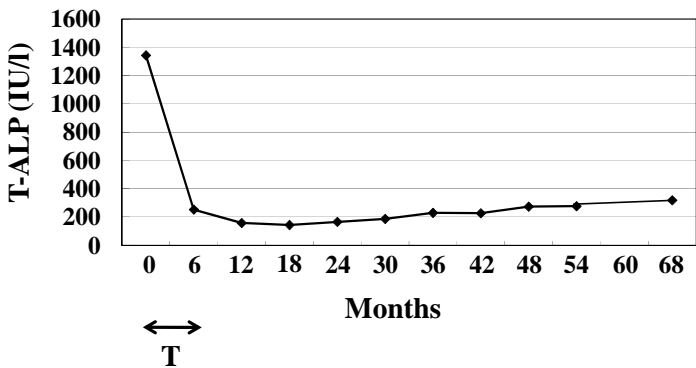

### Changes in uNTX level

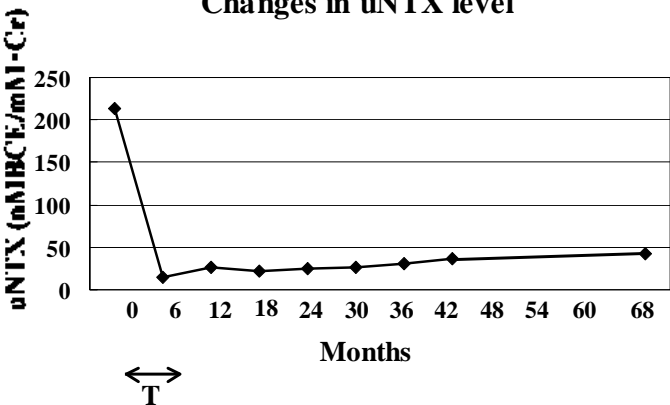

### Changes in bone pain (VAS)

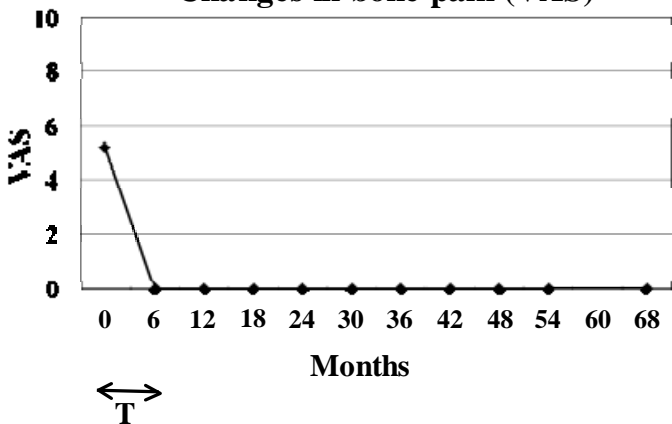

Supplement: MOESM2 [file 9647054]
